# Supplementary material for: Solution processable ter-anthrylene-ethynylenes semiconductors: thin film transistor properties and STM study on HOPG and Au(111)
Source: Royal Society of Chemistry journal article supplement (doi:10.1039/b921349j), 2010-01-01
Supplement: b921349j.pdf [file b921349j.pdf]

**Supplementary information**

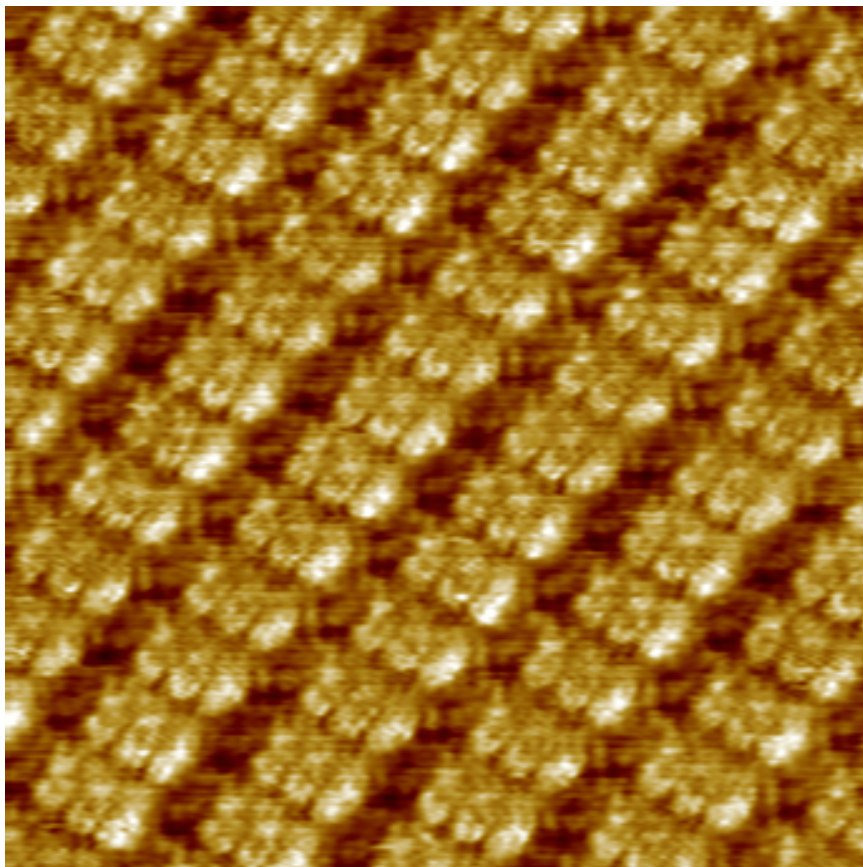

STM image of **O3A** at the n-tetradecane/HOPG interface ( $15 \times 15 \text{ nm}^2$ ;  $I_t=86 \text{ pA}$ ;  $V_t=400 \text{ mV}$ ).
